# Supplementary material for: When birds of a feather flock together: Severe genomic erosion and the implications for genetic rescue in an endangered island passerine
Source: PubMed Central journal article supplement (PMC11212007; doi:10.1111/eva.13739), 2024-06-28
Supplement: EVA-17-e13739-s001.pdf [file EVA-17-e13739-s001.pdf]

## **Supporting information for**

**When birds of a feather flock together: severe genomic erosion and the implications for genetic rescue in an endangered island passerine.**

Emily L. Cavill, Hernán E. Morales, Xin Sun, Michael V. Westbury, Cock van Oosterhout, Wilna Accouche, Anna Zora, Melissa J Schulze, Nirmal Shah, Pierre-André Adam, M. de L. Brooke, Paul Sweet, Shyam Gopalakrishnan, M. Thomas P. Gilbert

### **Contents**

#### **Supplementary Tables**

Supplementary Table S1: Documented specimen information and sequencing data information (including summary statistics, sexing and locality results) for the 37 historical SMR samples

#### **Supplementary Figures**

Supplementary Figure S1: Full admixture plot for the historical dataset up to  $k=5$ .

Supplementary Figure S2: Simulations demonstrating the effect of direct counts versus relative counts of genetic load.

Supplementary Figure S3: Distributions of life-history trait parameters (fecundity and mortality probabilities) used for the simulations presented in Figure 7.

Supplementary Figure S4: Simulations demonstrating that random donor selection performs as well as targeted donor selection for genetic rescue in the SMR.

Supplementary Figure S5: Simulations demonstrating that ancestral variation will not be recovered through intraspecific genetic rescue.

**Supplementary Table S1. Documented and sequencing data information for the 37 historic SMR samples.** The 37 successfully sequenced museum specimens were collected from populations from four granitic (native) and one coralline (introduced) islands, but five of these specimens had an unknown collection origin, including our oldest ‘LaFresnaye’ sample. The initial genetic population assignment of our museum samples allowed us to either confirm or reassign the sampling site of each specimen, or assign a locality where that information is not already available. The combination of the results of these analyses allowed us to confirm there is likely to have been a mislabelling with two of the historical samples between Aride and Marianne, collected on the same voyage. We therefore re-assigned populations to these samples going forward. The ‘LaFresnaye’ sample is the oldest contribution to our historical dataset, thus identifying the locality was of great interest. While neither the PCA nor the Admixture analyses alone gave a definitive result to its origin, when combined with the phylogenetic analysis we are now confident that the sample was collected from Fregate Island. We were able to determine sex through a coverage-based method using ANGSD and offer new information where it wasn’t previously available, or confirm/correct documented information. Some samples did not reach coverage considered reliable for this sexing method and are not presented. The knowledge gained from the sequencing data was passed to the respective museums, and we value the genetic origin assignment of museum samples as a good example of how genetics can be used to ‘complete’ museum collections.

In this table, from left to right, we include **SAMPLE:** the sample name is that used throughout the study. **INSTITUTE:** \*Loan Institutions are abbreviated to a 4-letter acronym: AMNH = American Museum of Natural History, New York; MZCU = Museum of Zoology, Cambridge University; HMCZ = Museum of Comparative Zoology, Harvard University; NHML = Natural History Museum, London; MNHN = Muséum d’Histoire Naturelle, Paris; SNMH = National Museum of Natural History, Smithsonian Institution; YPBM = The Peabody Museum of Natural History, Yale University. **MUSEUM NO:** the collection numbers associated with each specimen. **DOC DATE:** the documented date we have associated with each specimen. **DOC ISLAND and SEQ ISLAND:** the documented and confirmed or reassigned through our sequencing data. \*\*While Praslin only has one sample so we cannot ‘confirm or deny’ the collection locality through our data, we know where this sample came from, the collector only collected one sample from Praslin on this date. **DOC SEX and SEQ SEX:** the documented sex associated with the specimen and the sexing results from our sequencing data. **TOTAL READS:** we also include the total reads generated for each sample. **ENDOG:** and the total endogenous content of the sample, calculated as percentage of total reads that map uniquely to the SMR genome. **COV:** the final coverage for each sample. >78% of the historic samples met the 4X threshold used for many of our analyses.

| <b>SRA ID</b> | <b>INSTITUTE*</b> | <b>MUSEUM NO</b> | <b>DOC DATE</b> | <b>DOC ISLAND</b> | <b>SEQ ISLAND</b> | <b>DOC SEX</b> | <b>SEQ SEX</b> | <b>TOTAL READS</b> | <b>ENDOG</b> | <b>COV</b> |
|---------------|-------------------|------------------|-----------------|-------------------|-------------------|----------------|----------------|--------------------|--------------|------------|
| hist01        | AMNH              | SKIN 580154      | 1905            | Aride             | Aride             | male           | male           | 342,227,032        | 44.23%       | 5.23       |
| hist02        | AMNH              | SKIN 580156      | 1904            | Marianne          | Marianne          | male           | male           | 244,035,581        | 19.85%       | 4.53       |
| hist03        | YPBM              | ORN 040909       | 1958            | Fregate           | Fregate           | female         | female         | 260,168,868        | 58.44%       | 9.11       |
| hist04        | AMNH              | SKIN 580158      | 1904            | Marianne          | Marianne          | male           | male           | 166,320,727        | 40.30%       | 3.56       |

|        |      |                     |          |          |          |         |        |             |        |       |
|--------|------|---------------------|----------|----------|----------|---------|--------|-------------|--------|-------|
| hist05 | AMNH | SKIN 580159         | 1904     | Marianne | Marianne | female  | female | 362,069,454 | 43.71% | 8.54  |
| hist06 | AMNH | SKIN 580161         | 1904     | Alphonse | Alphonse | female  | female | 299,941,434 | 48.91% | 9.23  |
| hist07 | AMNH | SKIN 580162         | 1904     | Alphonse | Alphonse | female  | male   | 197,750,998 | 44.75% | 5.29  |
| hist08 | AMNH | SKIN 580163         | unknown  | unknown  | Marianne | unknown | female | 97,320,372  | 47.01% | 9.07  |
| hist09 | MNHN | MNHN-ZO-MO-1878-563 | pre-1879 | Aride    | Aride    | male    | female | 271,488,059 | 35.9%  | 5.14  |
| hist10 | MNHN | MNHN-ZO-MO-1878-575 | pre-1879 | Aride    | Marianne | female  | male   | 290,865,245 | 36.9%  | 5.71  |
| hist11 | YPBM | ORN 040908          | 1958     | Fregate  | Fregate  | female  | -      | 297,318,637 | 12.49% | 2.03  |
| hist12 | MNHN | MNHN-ZO-MO-1878-580 | pre-1879 | Aride    | Aride    | female  | female | 193,930,086 | 39.3%  | 6.49  |
| hist13 | MNHN | MNHN-ZO-MO-1878-587 | pre-1879 | Marianne | Aride    | male    | male   | 270,454,754 | 50.5%  | 6.15  |
| hist14 | AMNH | SKIN 580155         | 1904     | Aride    | Aride    | male    | female | 250,521,622 | 35.49% | 5.24  |
| hist15 | AMNH | SKIN 580160         | 1904     | Marianne | Marianne | female  | female | 386,515,886 | 55.21% | 8.06  |
| hist16 | HMCZ | Ornithology 76293   | pre-1861 | unknown  | Fregate  | unknown | male   | 382,252,003 | 43.74% | 11.08 |
| hist17 | LNHM | 1868.6.16.8         | 1867     | Marianne | Marianne | male    | male   | 418,847,337 | 50.38% | 9.53  |
| hist18 | LNHM | 1888.4.20.96        | 1879     | Marianne | Marianne | -       | female | 210,793,931 | 39.98% | 4.62  |
| hist19 | LNHM | 1895.5.1.909        | pre-1895 | Aride    | Aride    | male    | male   | 247,996,934 | 53.62% | 7.3   |
| hist20 | LNHM | 1895.5.1.910        | pre-1895 | unknown  | Marianne | female  | female | 189,048,592 | 50.90% | 5.05  |
| hist21 | LNHM | 1895.5.1.911        | pre-1895 | unknown  | Marianne | -       | female | 240,566,111 | 40.36% | 5.00  |
| hist22 | LNHM | 1909.4.6.30         | pre-1909 | unknown  | Marianne | -       | male   | 201,450,869 | 54.40% | 6.08  |
| hist23 | LNHM | 1909.4.6.31         | pre-1909 | unknown  | Marianne | -       | female | 196,027,704 | 60.49% | 7.11  |
| hist24 | LNHM | 1927.12.18.383      | 1888     | Marianne | Marianne | male    | male   | 230,852,236 | 52.13% | 6.14  |
| hist25 | LNHM | 1927.12.18.384      | 1888     | Marianne | Marianne | female  | female | 188,259,165 | 52.31% | 5.2   |
| hist26 | LNHM | 1927.12.18.385      | 1888     | Marianne | Marianne | male    | male   | 188,448,978 | 46.87% | 4.52  |
| hist27 | LNHM | 1946.75.18a         | 1940     | Fregate  | Fregate  | female  | female | 334,444,097 | 51.03% | 7.97  |
| hist28 | LNHM | 1955.63.4           | 1955     | Fregate  | Fregate  | female  | female | 185,612,156 | 59.08% | 6.26  |
| hist29 | LNHM | 1996.51.1           | 1991     | Fregate  | Fregate  | male    | male   | 211,554,221 | 40.24% | 5.38  |
| hist30 | LNHM | 1946.75.16a         | 1940     | Fregate  | Fregate  | female  | -      | 87,780,683  | 23.82% | 1.23  |
| hist31 | SNMH | 119759              | 1890     | Marianne | Marianne | female  | -      | 10,599,191  | 31.11% | 0.17  |

|        |      |               |      |           |          |        |      |             |        |      |
|--------|------|---------------|------|-----------|----------|--------|------|-------------|--------|------|
| hist32 | SNMH | 128666        | 1892 | Alphonse  | Alphonse | male   | male | 254,465,448 | 26.23% | 4.15 |
| hist33 | MZCU | 27/Tur/17/g/2 | 1867 | Praslin** | -        | male   | male | 150,646,231 | 32.52% | 4.05 |
| hist34 | MZCU | 27/Tur/17/g/3 | 1867 | Marianne  | Marianne | female | -    | 39,244,697  | 52.78% | 1.49 |
| hist35 | MZCU | 27/Tur/17/g/4 | 1867 | Marianne  | Marianne | male   | -    | 55,254,491  | 53.62% | 2.08 |
| hist36 | MZCU | 27/Tur/17/g/5 | 1867 | Marianne  | Marianne | female | -    | 49,463,953  | 56.76% | 1.73 |
| hist37 | MZCU | 27/Tur/17/g/6 | 1867 | Marianne  | Marianne | male   | -    | 39,249,407  | 53.86% | 1.57 |

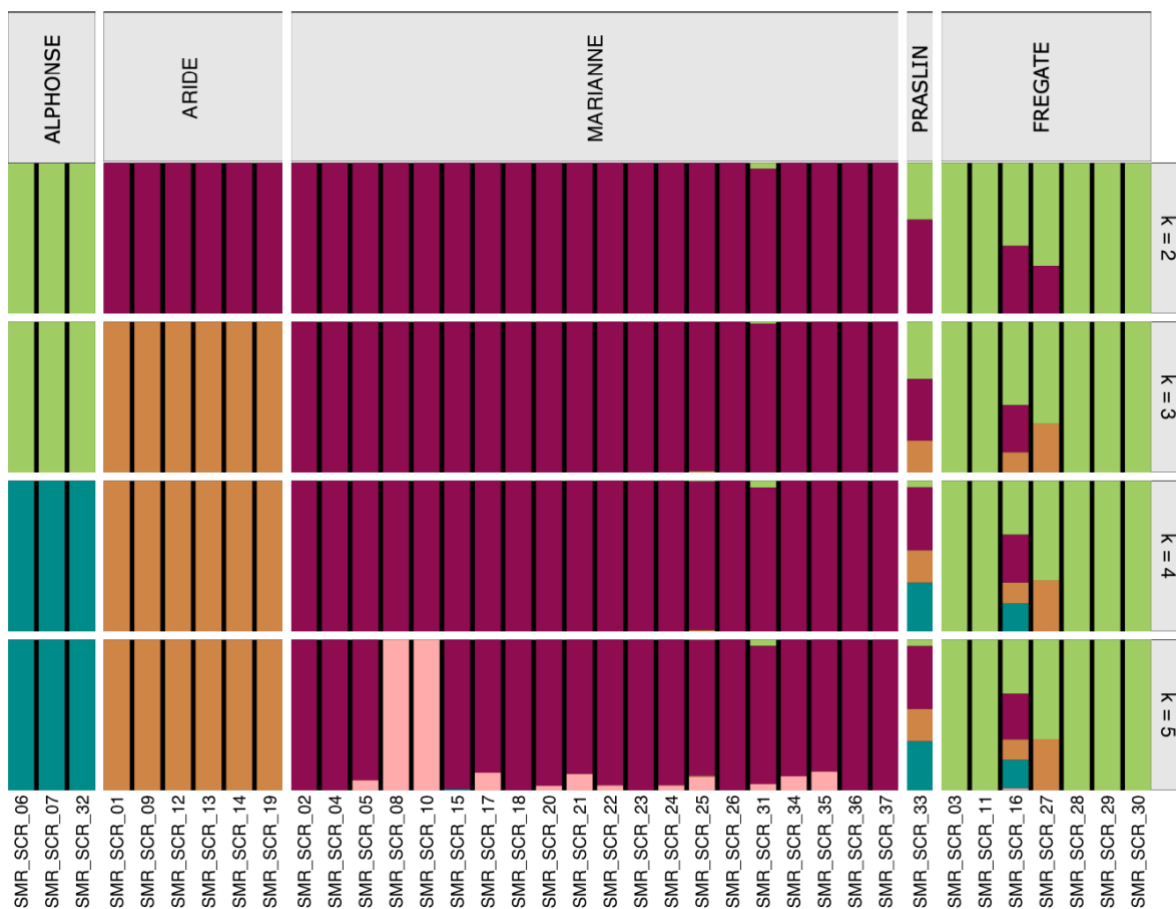

**Supplementary Figure S1. Full admixture plot for the historical dataset.** Admixture plot assuming 2 to 5 ancestry components where each bar represents the ancestry proportions per sample.  $k=3$  separates the Aride population,  $k=5$  supports no further insight for genetic differentiation between populations, only within the Marianne Island population. Sample ‘SMR\_SCR\_16’ (hist16) is the oldest collected sample of the dataset: ‘pre-1861’.

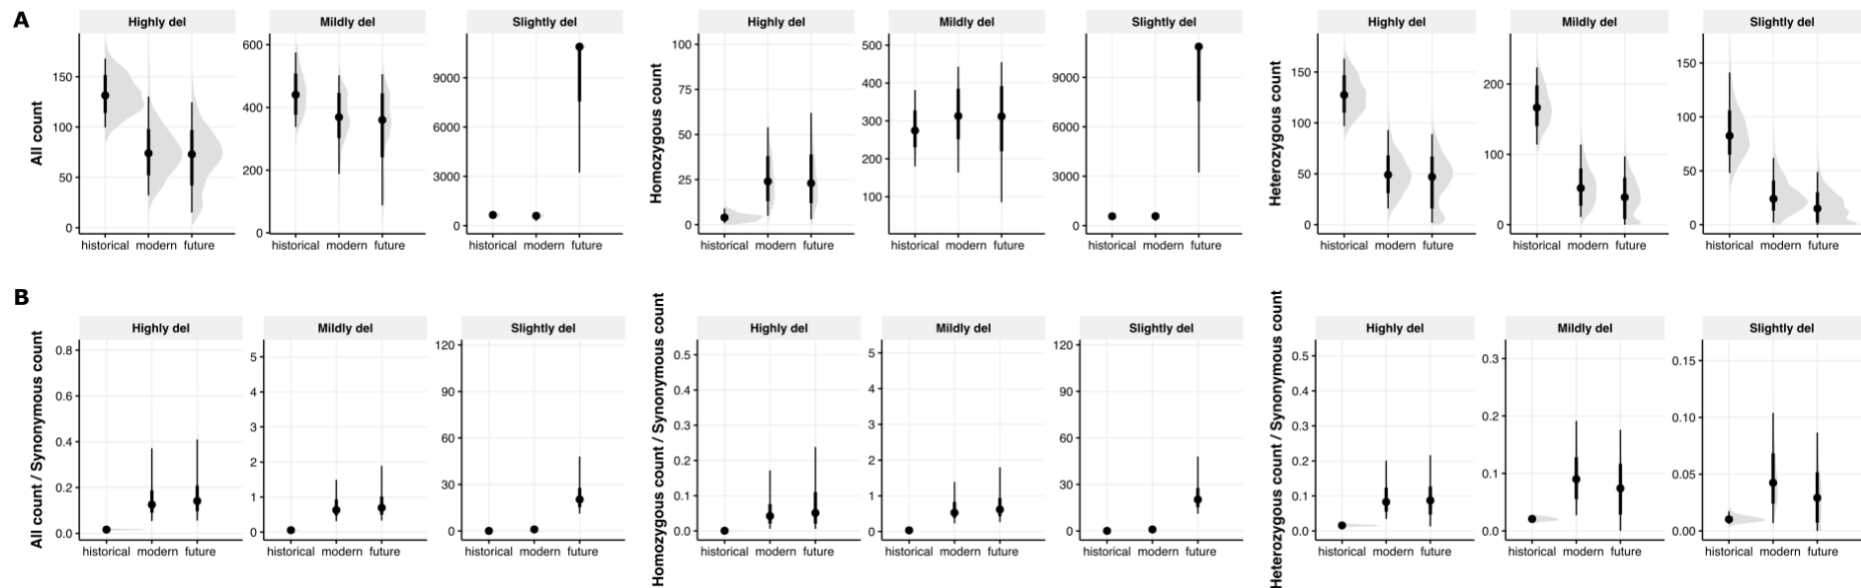

**Supplementary Figure S2. Effect of direct counts versus relative counts of genetic load.** We simulated the effect of **A**) counting mutations versus **B**) considering relative counts /normalised over synonymous. An ancestral population has high masked load and low realized load, as they go through a bottleneck, lots of the rare variation is simply lost (by drift) reducing the masked load. Another portion of it is converted from masked load to realised load. Of the converted load some is “seen” by selection and removed (purging; mostly highly deleterious variation) whilst other escaped selection and accumulated (mostly slightly/mildly deleterious variation). This is why the expectation is for both purging and accumulation. The bottleneck population will have less total genetic load, because it has less masked load, but it will have higher realised load (i.e., is on average less fit than the ancestral). This we cannot estimate from empirical data because we cannot fully estimate masked and realised load, thus with the empirical data we count alleles and distinguish LoF, missense and heterozygous or homozygous load to approximate these dynamics. If we were to simply count alleles directly, we would see what is described above. However, due to the characteristics of historical sequencing data, we do relative counts to synonymous mutations. So, while the ancestral population may have more LoF alleles, this is alongside more synonymous alleles. While the contemporary populations may have fewer LoFs (due to purging), there are also fewer synonymous alleles. Thus, we observe a higher relative count. We are therefore underpowered to detect purging and cannot really conclude that there is only load accumulation. However, we know from genetic theory and simulations above that we can assume that there has been drift and purging, but also accumulation of load, and therefore that the modern populations are most likely, on average, less fit than the ancestral populations

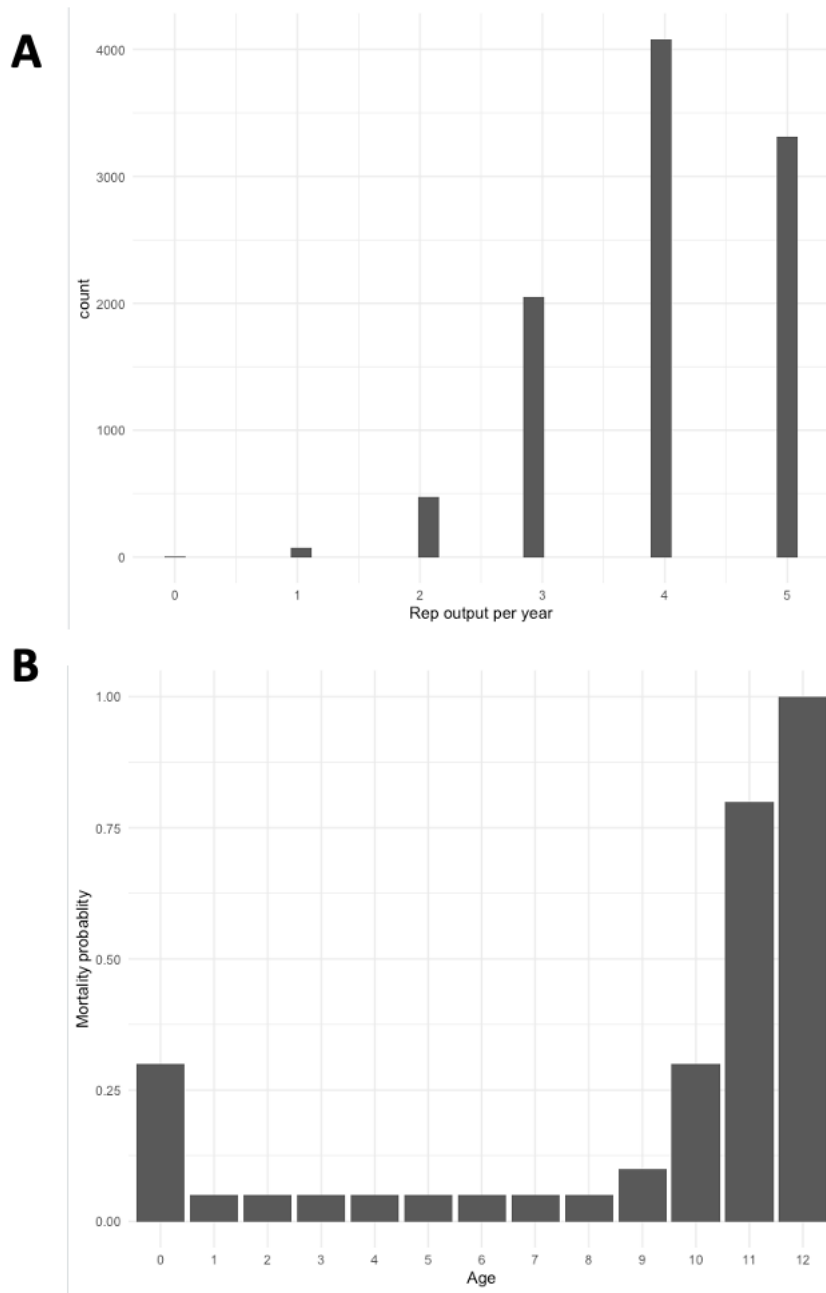

**Supplementary Figure S3. Distributions of life-history trait parameters used in the simulations. A) Fecundity: reproductive output probability per pair, per year. B) Mortality probabilities.**

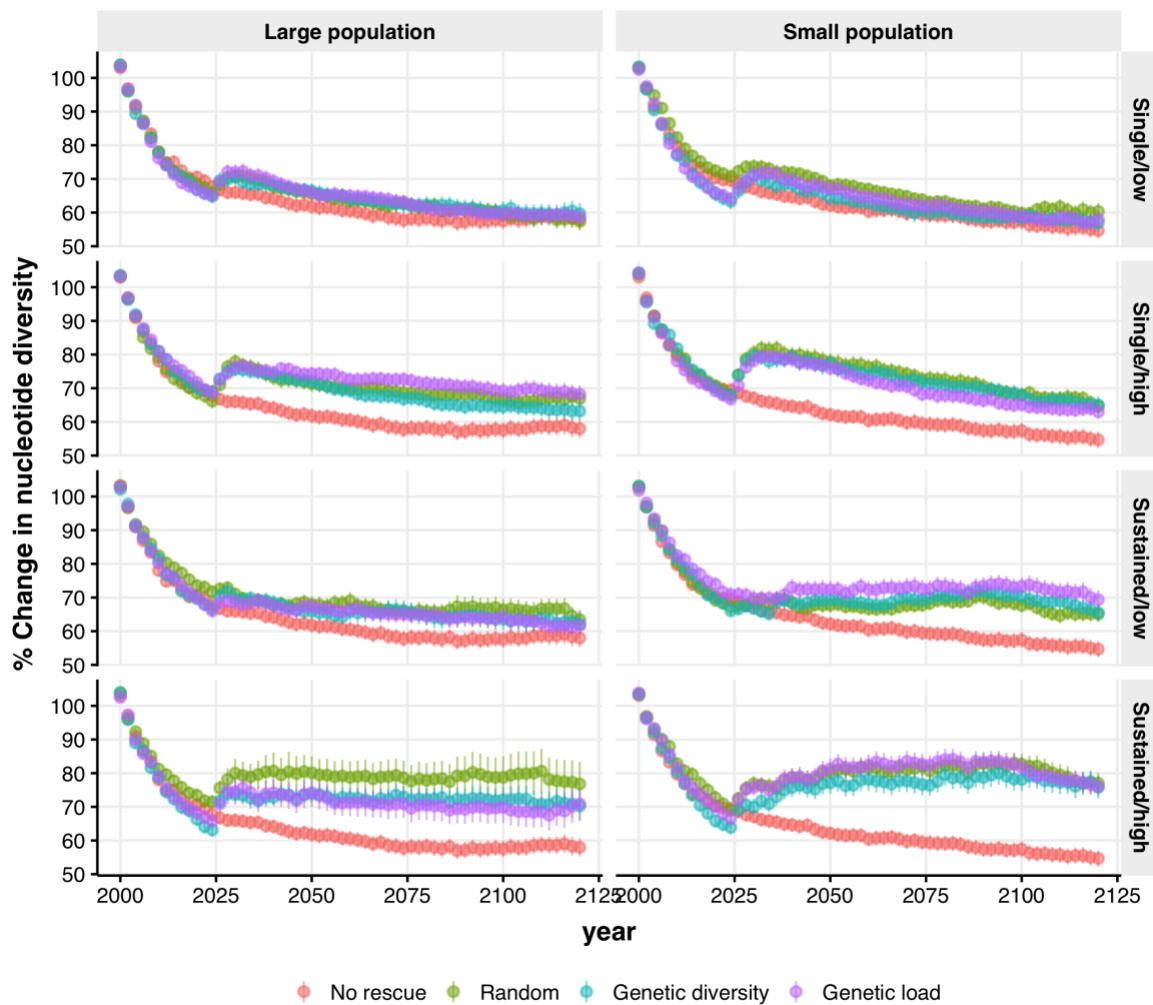

**Supplementary Figure S4. Random donor selection performs as well as targeted donor selection.** The "no rescue" regime is almost exclusively worse than any rescue regime. For targeted and random donor selection, the immediate effects (within a few generations) are substantial for nucleotide diversity, but they taper off and nearly disappear over time. In contrast, the reduction in realised load is less sharp but the effect is lasting. However, there is minimal difference between the "random", "genetic load" and "genetic diversity" donor selection regimes. Interestingly, in the "sustained/high" scenario for the large population, random selection actually out-performs targeted selection.



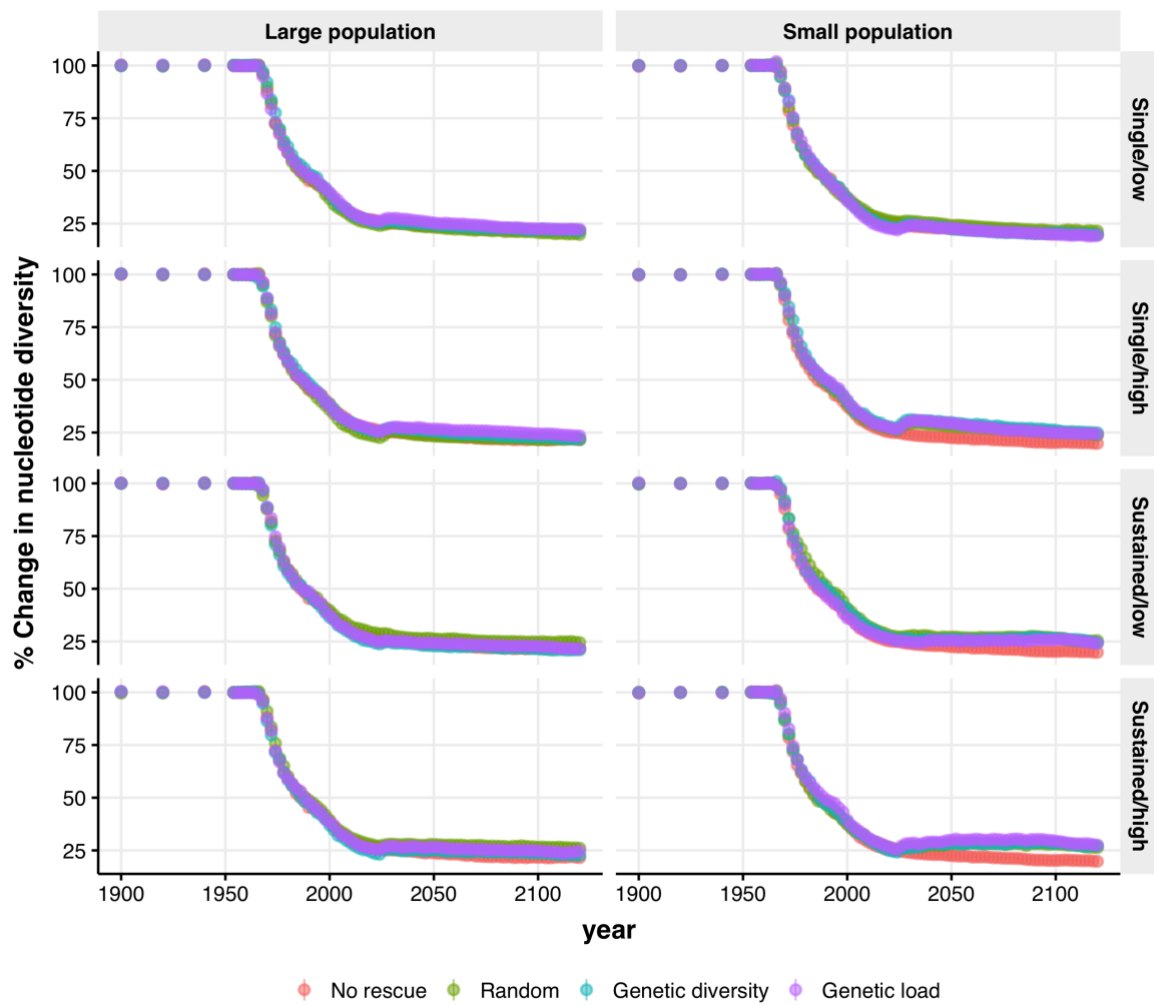

**Supplementary Figure S5. Ancestral variation will not be recovered through intraspecific genetic rescue.** Simulations show that intraspecific genetic rescue between the existing SMR populations may be enough to manage ongoing diversity loss, but this action alone will not be enough to recover the level which existed before the bottleneck.
